# Supplementary figures and images for: Parents’ perspectives on nusinersen treatment for children with spinal muscular atrophy
Source: PubMed Central journal article supplement — Dev Med Child Neurol. 2021 Feb 6;63(7):816–23. doi: 10.1111/dmcn.14825 (PMC8248060; doi:10.1111/dmcn.14825), 2021-02-06

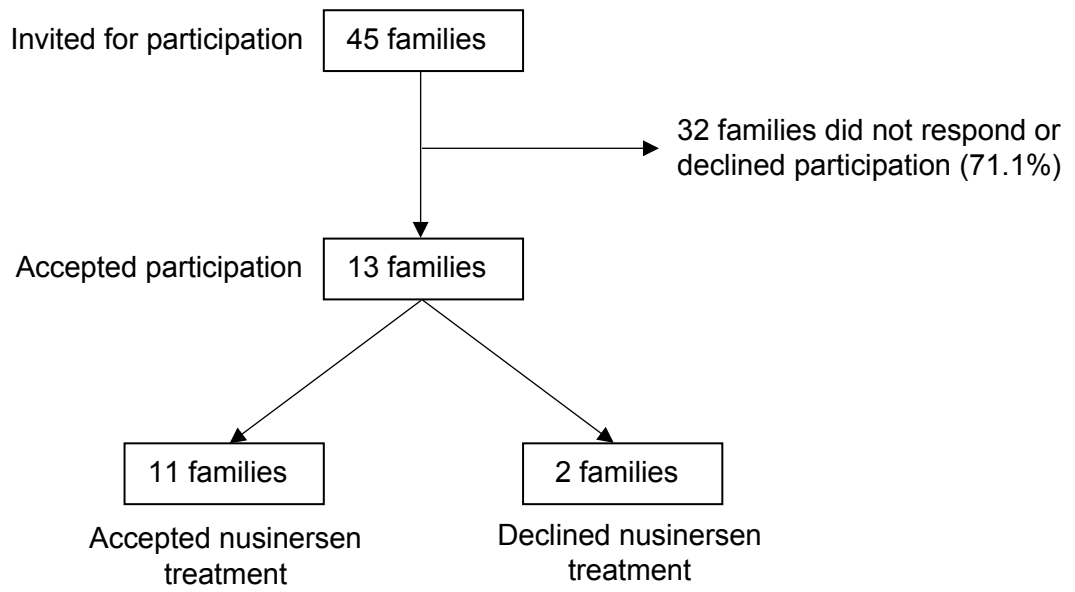

Supplement: DMCN-63-816-s001.pdf [file DMCN-63-816-s001.pdf]
